# Supplementary material
Source: Copernicus journal article supplement (doi:10.5194/cp-22-1105-2026)
Supplement: Supplementary file 1 [file cp-22-1105-2026-supplement.pdf]

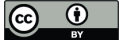

*Supplement of*

## **Non-linear climatic response to the weakening of the Atlantic Meridional Overturning Circulation during glacial times**

**Yanxuan Du et al.**

*Correspondence to:* Yanxuan Du ([yanxuand@student.unimelb.edu.au](mailto:yanxuand@student.unimelb.edu.au))

The copyright of individual parts of the supplement might differ from the article licence.

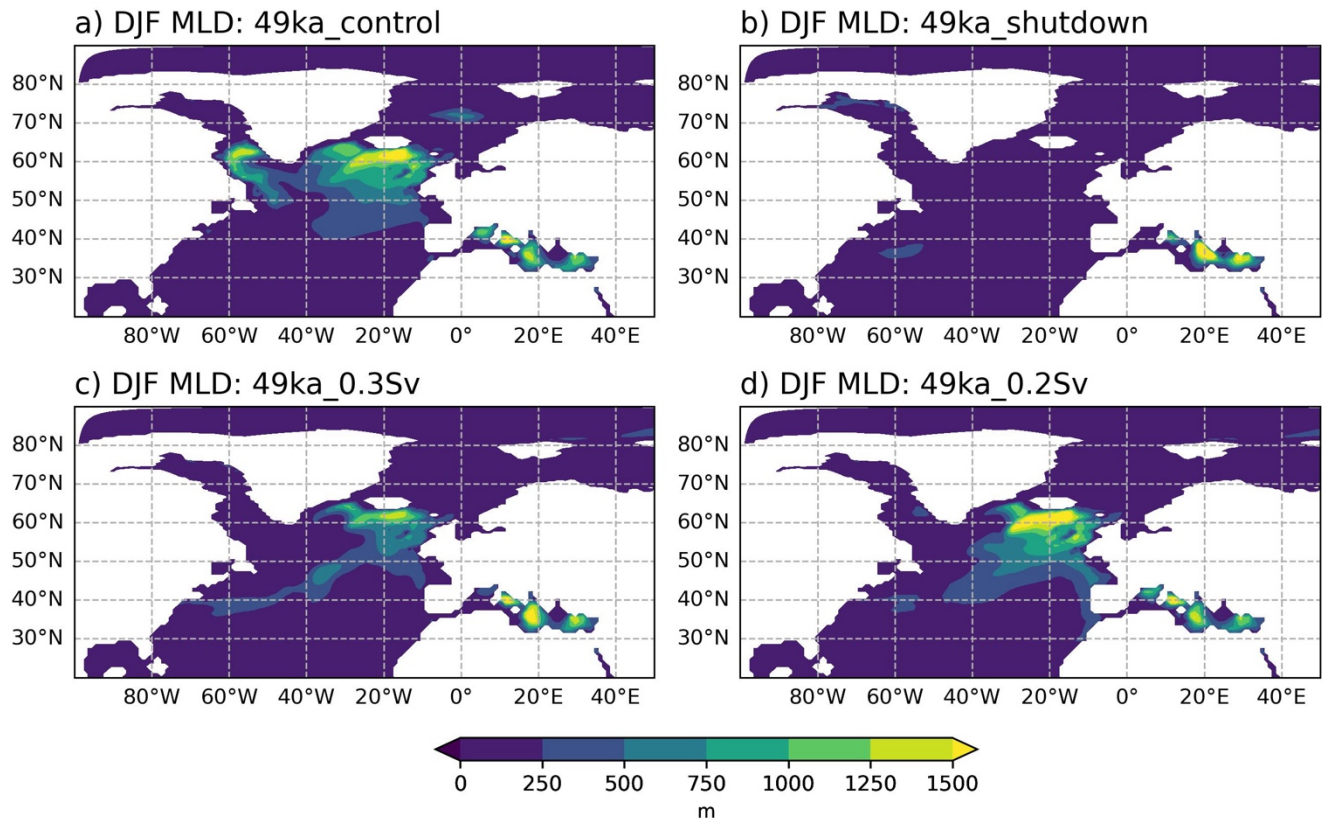

25 **Figure S1:** Full field mixed layer depth (MLD; in m) in the North Atlantic in DJF season for (a) 49ka\_control, Heinrich stadial (b) 49ka\_shutdown, and D-O stadial simulations (c) 49ka\_0.3Sv, (d) 49ka\_0.2Sv.

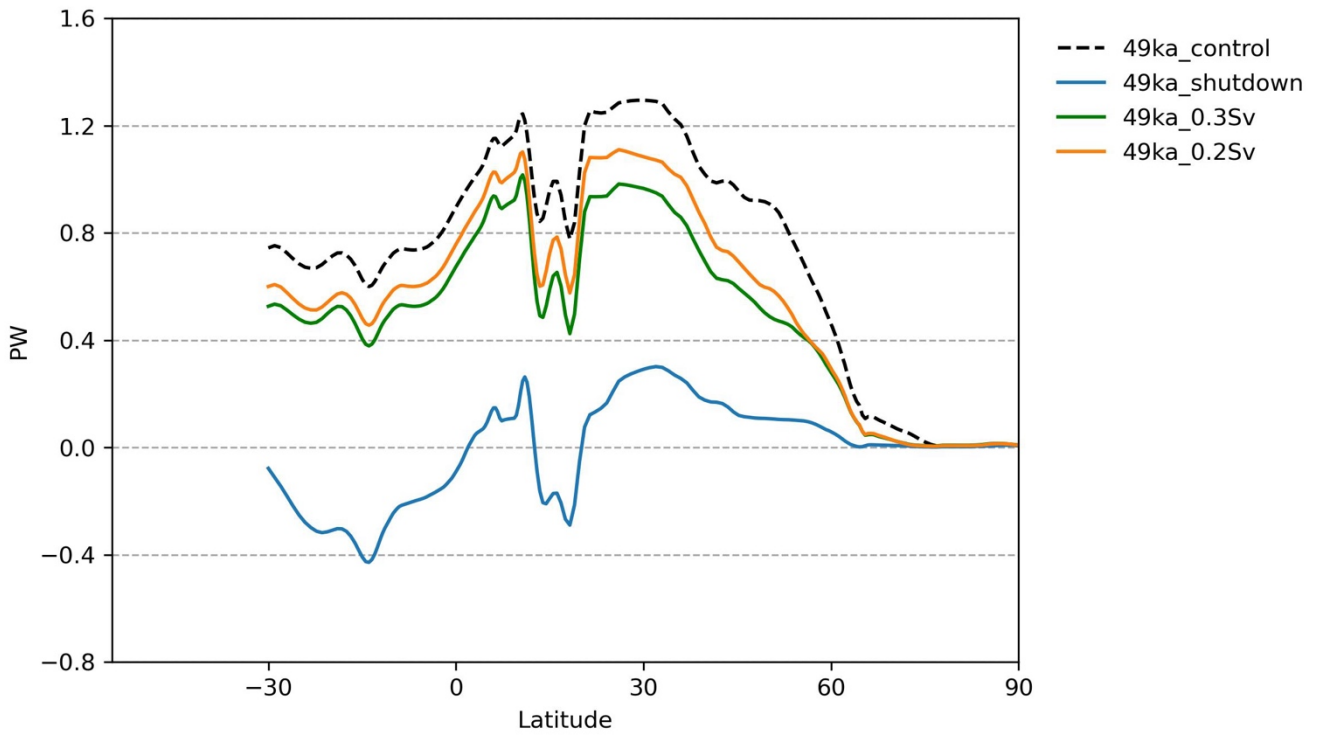

**Figure S2:** Northward oceanic heat transport (PW) in the Atlantic Ocean in 49ka\_control, 49ka\_shutdown, 49ka\_0.3Sv and 49ka\_0.2Sv simulations.

30

35

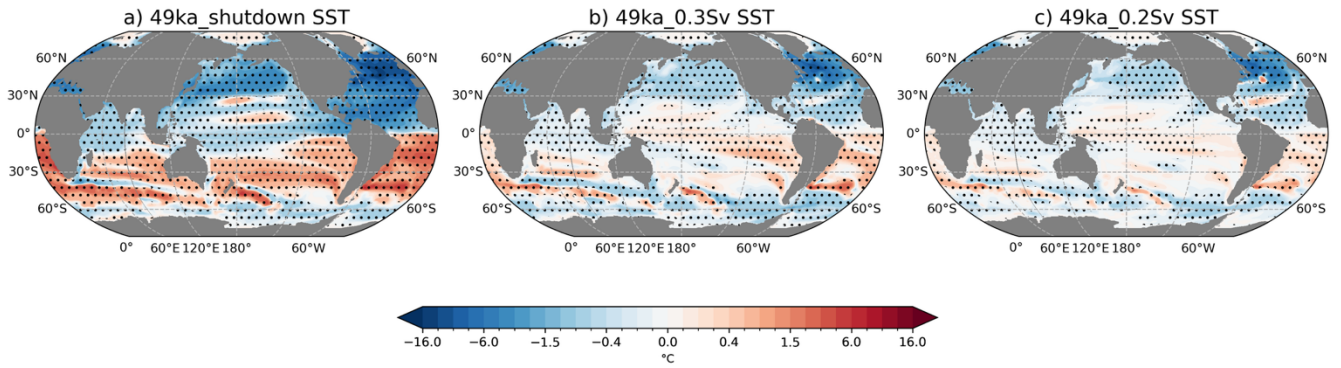

40

**Figure S3:** Annual mean sea surface temperature anomalies (SST; °C) relative to 49ka control in each simulation. Stippling indicates statically significant differences from the control at the 95 % confidence level according to the Student's t-test.

45

50

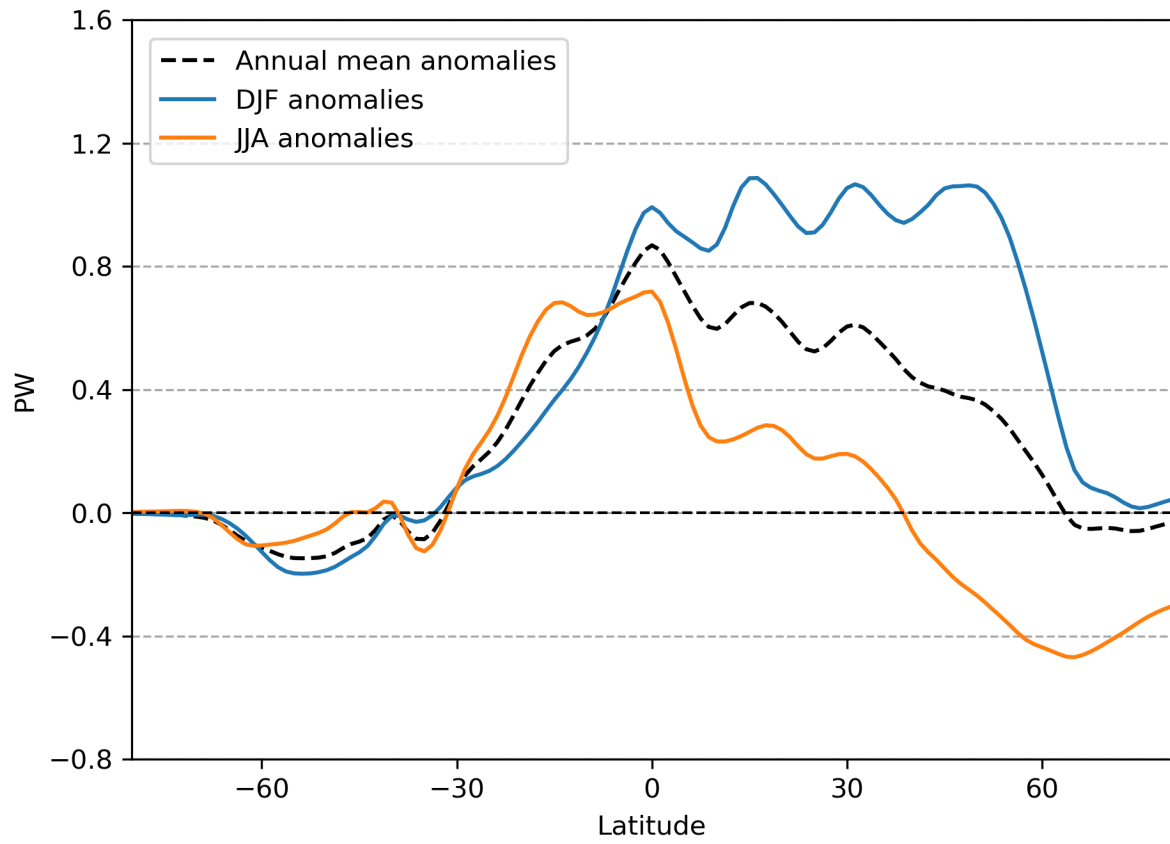

55 **Figure S4:** 49ka\_shutdown - 49ka\_control anomalies for annual mean, DJF, and JJA zonally averaged northward atmospheric heat transport (PW).

60

65

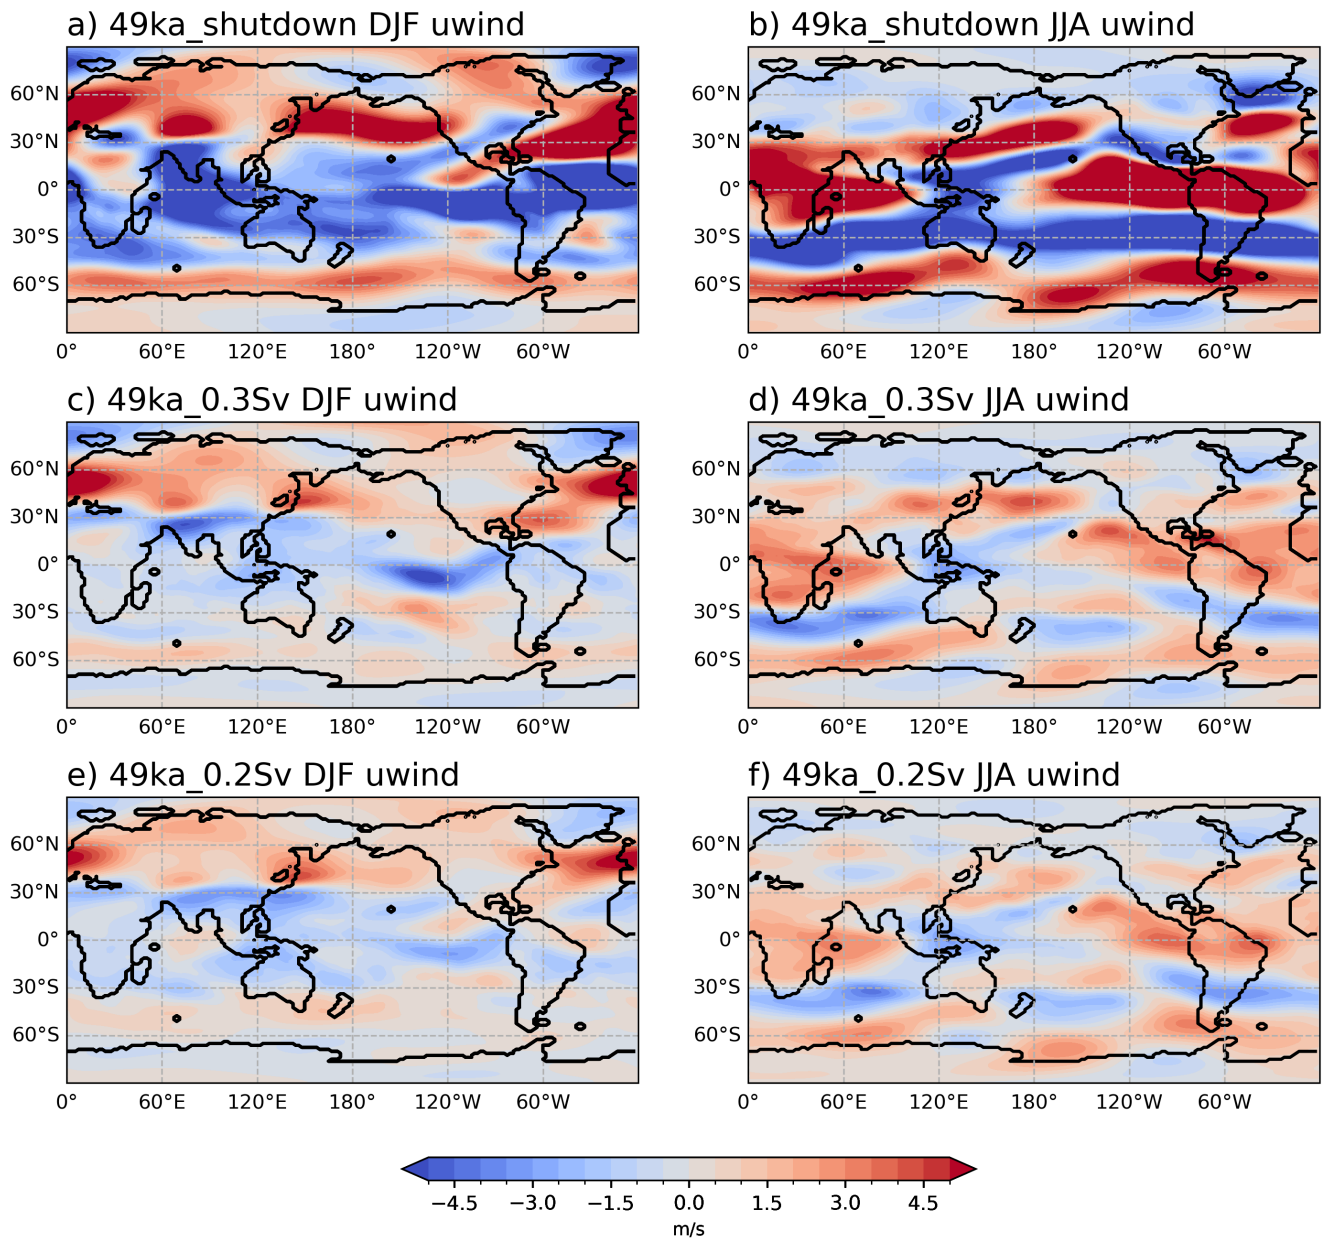

70

**Figure S5:** DJF and JJA 200 hPa zonal wind speed anomalies (m/s) relative to 49ka\_control in each simulation.

75

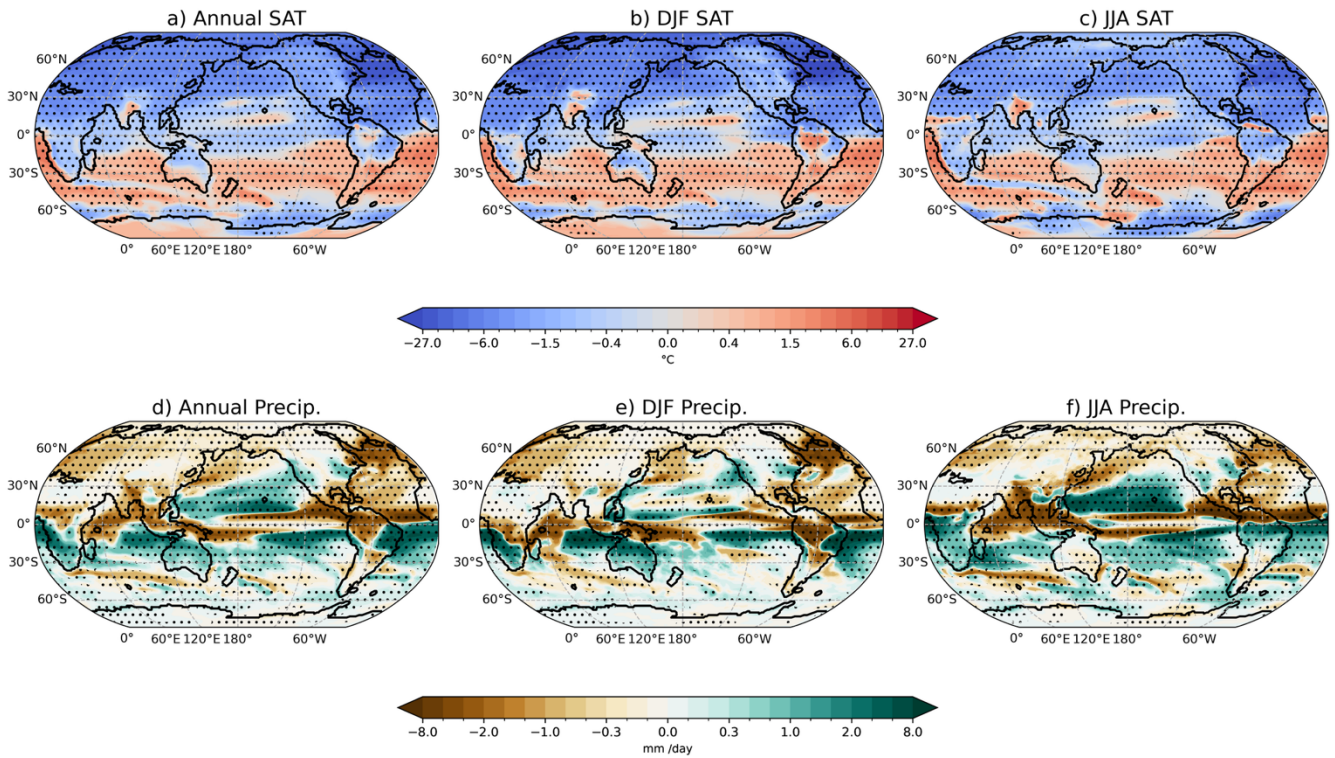

80 **Figure S6:** 49ka\_shutdown annual, DJF and JJA surface air temperature anomalies (SAT; °C), and precipitation anomalies (mm/day) relative to 49ka\_control. Stippling indicates statically significant differences from the control at the 95 % level according to the Student's t-test.

85

90

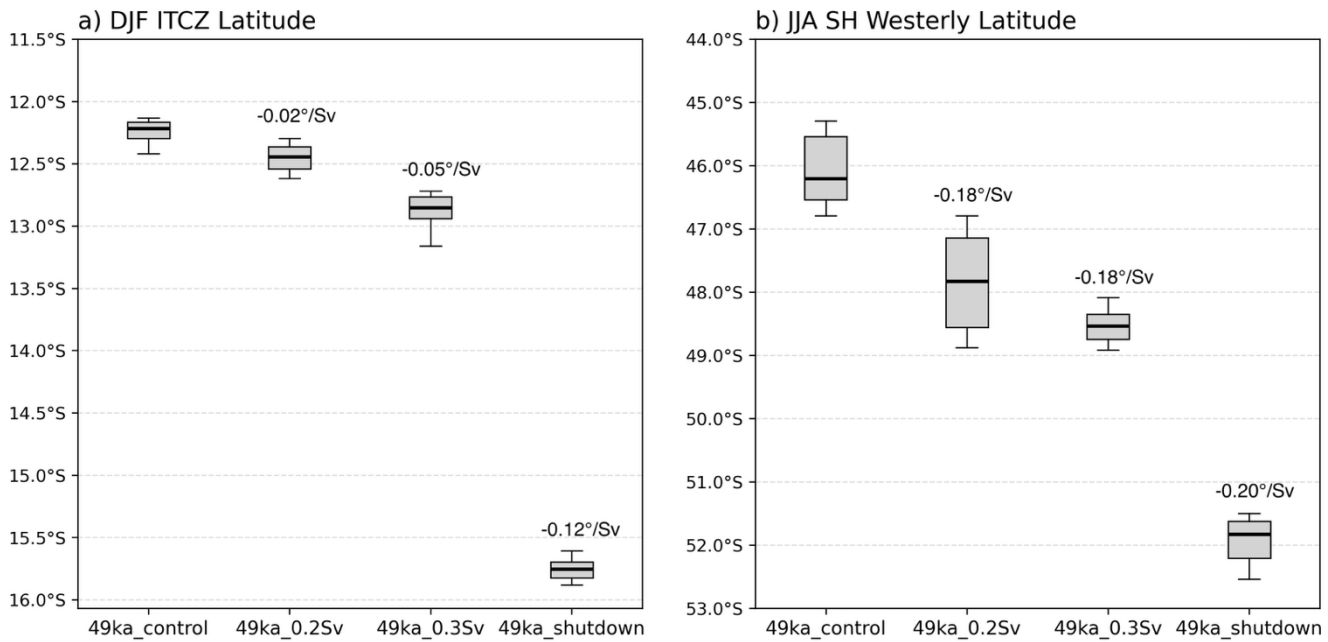

95

**Figure S7:** Box plot of 30-year mean across the last 150 years for a) DJF ITCZ latitudes, and b) JJA SH westerly wind latitude in each experiment. Within each box, the thick line inside the box represents the median value (50<sup>th</sup> percentile) of each group; the top and bottom of the box shows the 25<sup>th</sup> and 75<sup>th</sup> percentile, respectively; the whiskers show 10<sup>th</sup> to 90<sup>th</sup> percentile. Normalised changes relative to the control in ° per Sv AMOC decrease is shown on top of each AMOC weakening experiment.

100

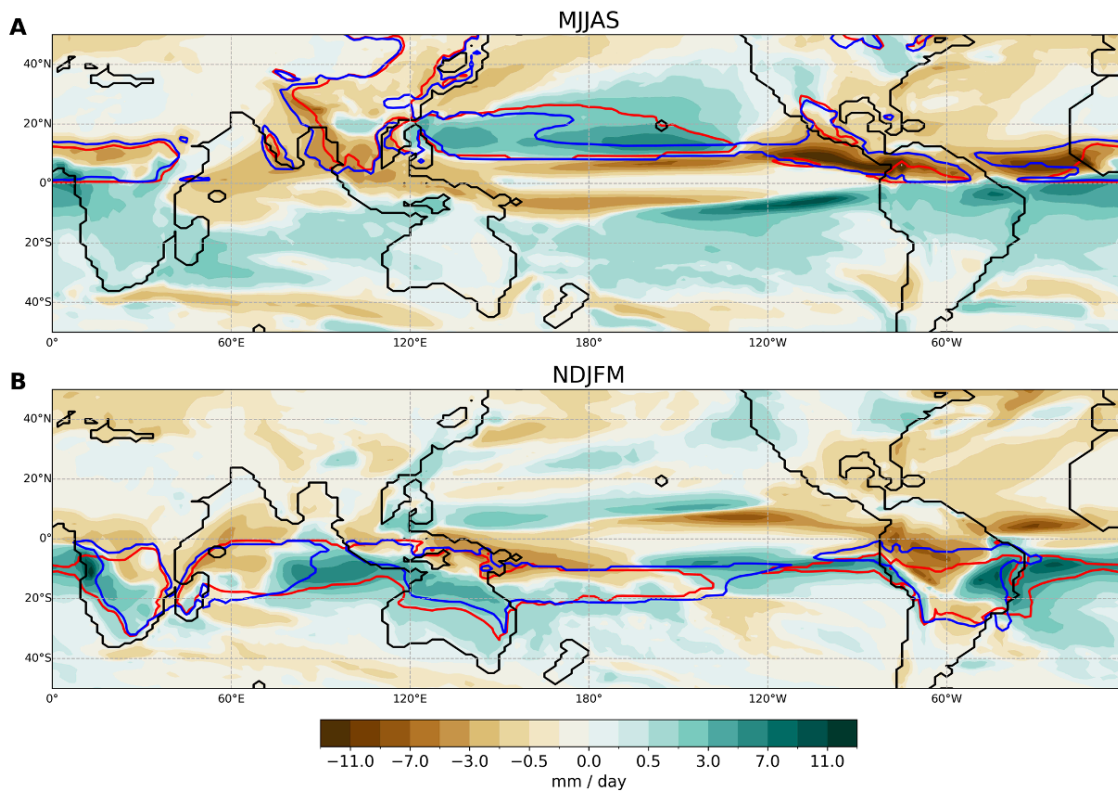

**Figure S8:** 49ka\_shutdown (Heinrich stadial) – 49ka\_control precipitation anomaly (mm/day) and monsoon domains in (a) Northern Hemisphere monsoon season: MJJAS, and (b) Southern Hemisphere monsoon season: NDJFM. Contours indicate monsoon domains for Heinrich stadial (in red) and for control (in blue) experiments.

105

110

115

120 **Table S1.** Area-weighted normalized annual mean surface air temperature (SAT) and precipitation anomalies per 1 Sv AMOC decrease in each experiment relative to 49ka\_control. This includes global, NH, SH (0-55° S) temperature changes, and global, NH, and SH (0-90° S) precipitation changes.

| Experiment    | Global SAT<br>(°C/Sv) | NH SAT<br>(°C/Sv) | SH SAT<br>(0-55° S)<br>(°C/Sv) | Global precip<br>(mm day <sup>-1</sup> /Sv) | NH precip<br>(mm day <sup>-1</sup> /Sv) | SH precip<br>(mm day <sup>-1</sup> /Sv) |
|---------------|-----------------------|-------------------|--------------------------------|---------------------------------------------|-----------------------------------------|-----------------------------------------|
| 49ka_0.2Sv    | -0.046                | -0.08             | -0.0023                        | -0.0029                                     | -0.0094                                 | 0.0036                                  |
| 49ka_0.3Sv    | -0.046                | -0.08             | -0.0026                        | -0.0027                                     | -0.009                                  | 0.0037                                  |
| 49ka_shutdown | -0.061                | -0.13             | 0.015                          | -0.0036                                     | -0.018                                  | 0.011                                   |

125

**Table S2.** Wintertime northern (DJF) and southern (JJA) HC mean latitudinal position (°), strength (Sv), and positions (°) of its ascending and descending branches at 500 hPa in each experiments, interpolated to 0.5° latitude resolution using the calculation methods described in Section 2.4.

| Experiment    | Northern HC in DJF   |                  |                         |                          | Southern HC in JJA   |                  |                         |                          |
|---------------|----------------------|------------------|-------------------------|--------------------------|----------------------|------------------|-------------------------|--------------------------|
|               | Mean position<br>(°) | Strength<br>(Sv) | Ascending branch<br>(°) | Descending branch<br>(°) | Mean position<br>(°) | Strength<br>(Sv) | Ascending branch<br>(°) | Descending branch<br>(°) |
| 49ka_control  | 8.125                | 476.8            | -15.6                   | 28.0                     | -0.375               | -486.6           | 14.9                    | -27.2                    |
| 49ka_0.2Sv    | 8.125                | 482.9            | -15.7                   | 27.9                     | -0.875               | -473.0           | 14.7                    | -27.4                    |
| 49ka_0.3Sv    | 8.125                | 487.1            | -15.9                   | 28.0                     | -0.875               | -467.0           | 14.3                    | -27.2                    |
| 49ka_shutdown | -1.875               | 572.5            | -17.1                   | 28.1                     | -8.375               | -328.7           | 18.4                    | -28.7                    |

130
